# Supplementary material
Source: publisher site journal article supplement (https://www.dovepress.com/get_supplementary_file.php?f=475302.docx)
Supplement: Supplementary file 1 [file get_supplementary_file.php]

Supplementary table1. Comparative analysis of radiometric indicators between radiation pneumonitis and non-radiation pneumonitis groups

| **Variables** | **Overall(N=228)** | **Radiation Pneumonitis (N=54)** | **Non-** **Radiation Pneumonitis (N=174)** | **P-value** |
| --- | --- | --- | --- | --- |
| TFLV (median [IQR]),cm3 | 3356.00 [3063.00, 3713.00] | 3329.50 [3064.00, 3647.00] | 3359.00 [3064.25, 3733.25] | 0.458 |
| PTVD90 (median [IQR]),Gy | 54.57 [53.15, 55.90] | 62.62 [60.08, 65.60] | 53.88 [52.76, 55.08] | <0.001 |
| PTVV50 (median [IQR]),% | 83.06 [80.83, 84.90] | 92.14 [88.30, 99.52] | 81.90 [80.13, 83.56] | <0.001 |
| Tdose (median [IQR]),Gy | 66.15 [62.56, 69.74] | 66.38 [62.61, 69.42] | 66.06 [62.51, 69.98] | 0.953 |
| MLD (median [IQR]),Gy | 9.46 [8.90, 10.02] | 12.20 [11.26, 13.12] | 9.19 [8.76, 9.67] | <0.001 |
| V5 (median [IQR]),% | 52.75 [49.83, 55.59] | 67.48 [64.88, 69.57] | 51.50 [49.03, 53.68] | <0.001 |
| V10 (median [IQR]),% | 44.57 [42.81, 46.49] | 51.74 [49.47, 54.35] | 43.72 [42.36, 45.09] | <0.001 |
| V15 (median [IQR]),% | 35.11 [33.23, 37.76] | 42.26 [40.93, 44.07] | 34.12 [32.80, 36.05] | <0.001 |
| V20 (median [IQR]),% | 21.74 [20.23, 23.14] | 27.42 [25.50, 29.15] | 21.01 [19.88, 22.07] | <0.001 |
| V30 (median [IQR]),% | 9.09 [7.77, 10.10] | 8.81 [7.69, 10.17] | 9.11 [7.77, 10.09] | 0.941 |
| V40 (median [IQR]),% | 3.67 [3.20, 4.15] | 3.87 [3.34, 4.30] | 3.62 [3.15, 4.08] | 0.046 |

Abbreviation annotations:IQR: Interquartile range; TFLV:Lung volume;PTVD90:90% planned target area acceptance dose;PTVV50: proportion of 50 Gy irradiation plan target area;Tdose: Total dose;MLD: Lung mean dose.

Supplementary table2. Radiomics features and dose-volume parameter associated with radiation pneumonitis by LASSO regression analysis

| **Radiomics features** | **Coefficients** |
| --- | --- |
| Stage | 4.21 |
| PTVD90 | -1.82 |
| PTVV50 | -1.19 |
| MLD | 21.21 |
| V5 | 6.32 |
| V10 | 5.28 |
| V15 | 2.23 |
| V20 | 4.26 |

Abbreviation annotations: PTVD90:90% planned target area acceptance dose;PTVV50: proportion of 50 Gy irradiation plan target area; MLD: Lung mean dose.

Supplementary table3. Gini index weight distribution based on random forest prediction model

| Variables | %IncMSE | IncNodePurity |
| --- | --- | --- |
| Stage | -2.85E-35 | 1.43E-15 |
| PTVD90 | 14.43546016 | 7.049814 |
| PTVV50 | 6.472694907 | 1.517669 |
| MLD | 14.70045253 | 7.245191 |
| V5 | 13.59501543 | 6.189969 |
| V10 | 14.68050861 | 7.230701 |
| V15 | 13.36980691 | 6.217802 |
| V20 | 12.43356808 | 5.498604 |

Abbreviation annotations:IncMSE: Increase in mean squared error; IncNodePurity: Increase in node purity; PTVD90:90% planned target area acceptance dose;PTVV50: proportion of 50 Gy irradiation plan target area; MLD: Lung mean dose.
